# Supplementary material
Source: PubMed Central journal article supplement (PMC2515627)

**Remarkable Phosphine-Effect on the Intramolecular Aldol Reactions of  
Unsaturated 1,5-Diketones: Highly Regioselective Synthesis of Cross-  
Conjugated Dienones**

Reema K. Thalji<sup>†</sup> and William R. Roush<sup>\*‡</sup>

<sup>†</sup>Department of Chemistry, University of Michigan, Ann Arbor, MI 48109-1055

<sup>‡</sup>Department of Chemistry, Scripps-Florida, Jupiter, FL 33485

e-mail: [roush@scripps.edu](mailto:roush@scripps.edu)

**Supporting Information—Part II**  
**Copies of <sup>1</sup>H NMR Spectra**



PKT-1-15a  
Pulse Sequence: s2pu1  
Solvent: CDCl3  
Ambient temperature  
INOVA-400 "Zr"  
PULSE SEQUENCE  
Pulse 45.0 degrees  
Acq. time 2.666 sec  
Width 6000.6 Hz  
8 repetitions  
OBSERVE H1, 399.9649645 MHz  
DATA PROCESSING  
Line broadening 0.2 Hz  
FT size 32768  
Total time 0 min, 21 sec

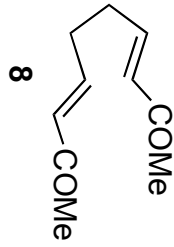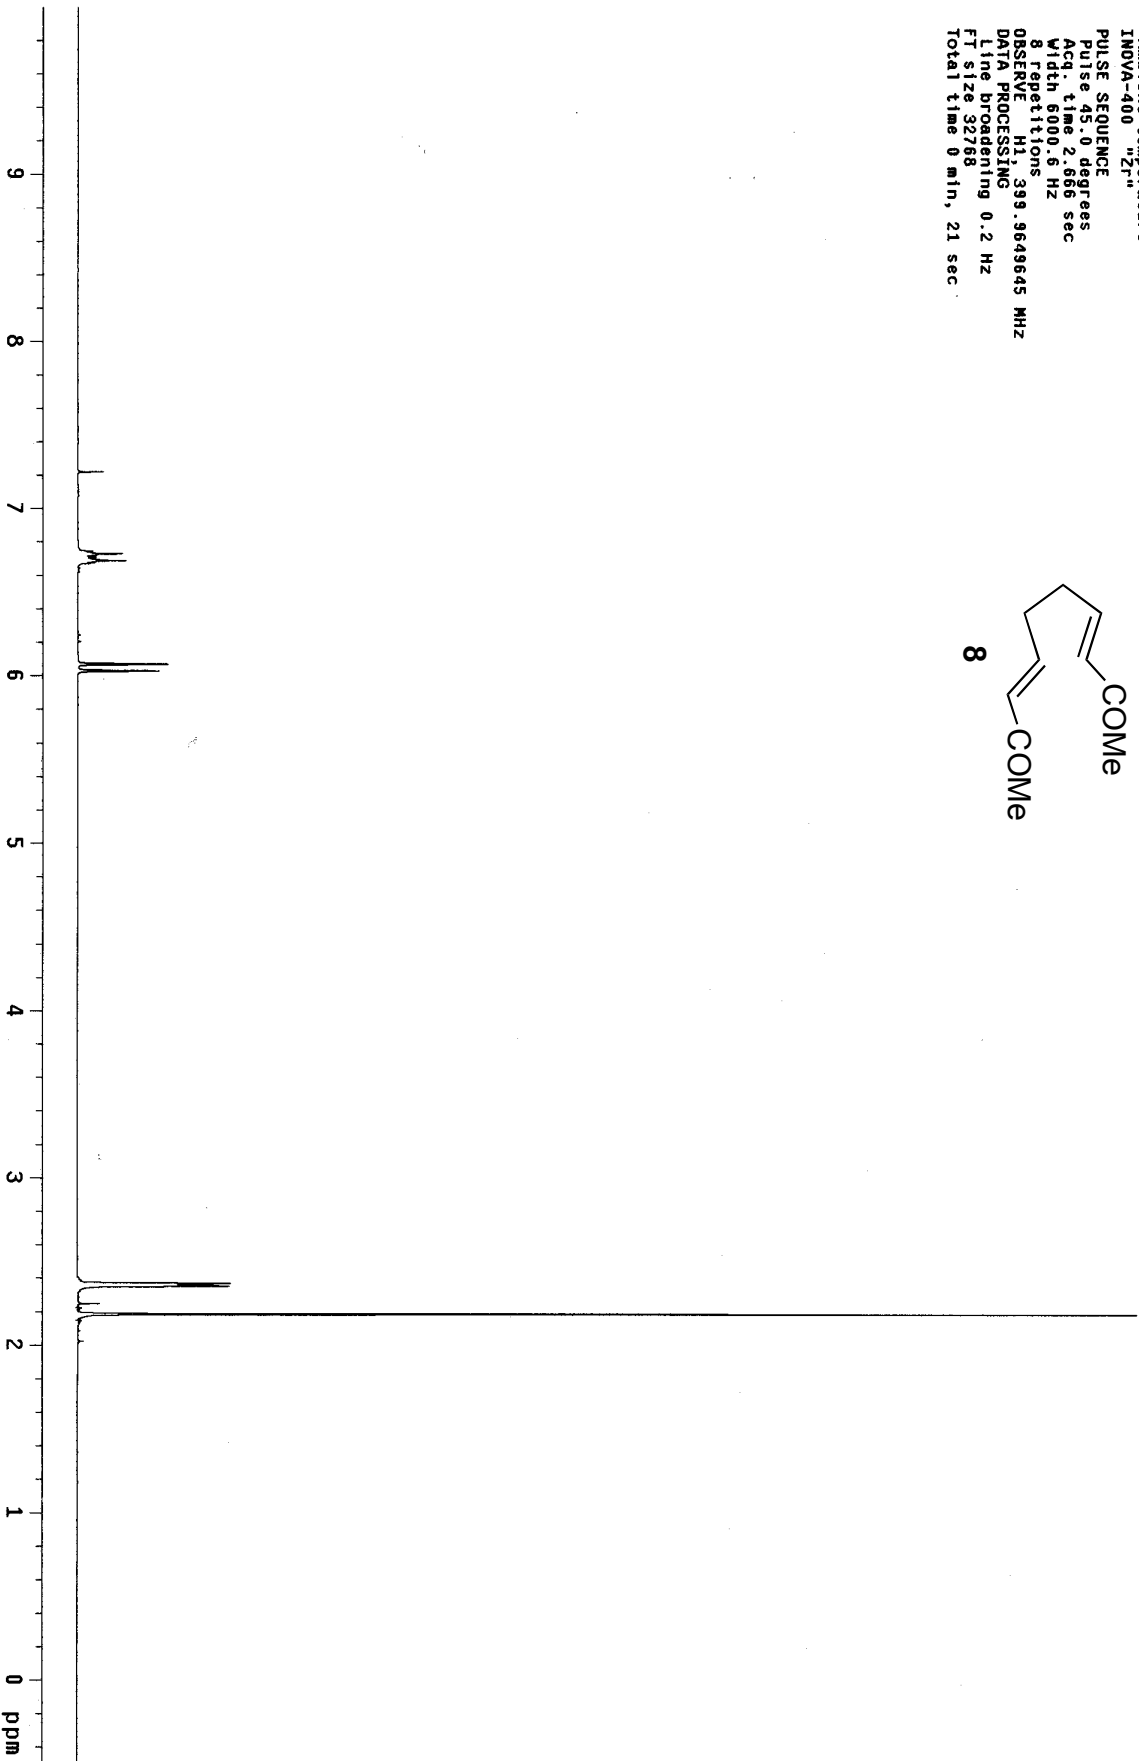

rkt-i-62a

Pulse Sequence: szpu1

Solvent: CDCl3

Ambient temperature

File: rkt-i-62a

INOVA-500 "K"

PULSE SEQUENCE

Relax. delay 1.000 sec

Pulse 49.0 degrees

Acq. time 2.500 sec

Width 8000.0 Hz

Single scan

OBSERVE H1, 499.9042537 MHz

DATA PROCESSING

FI size 65536

Total time 0 min, 3 sec

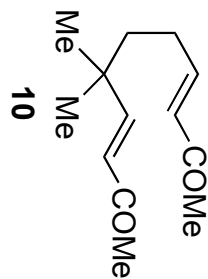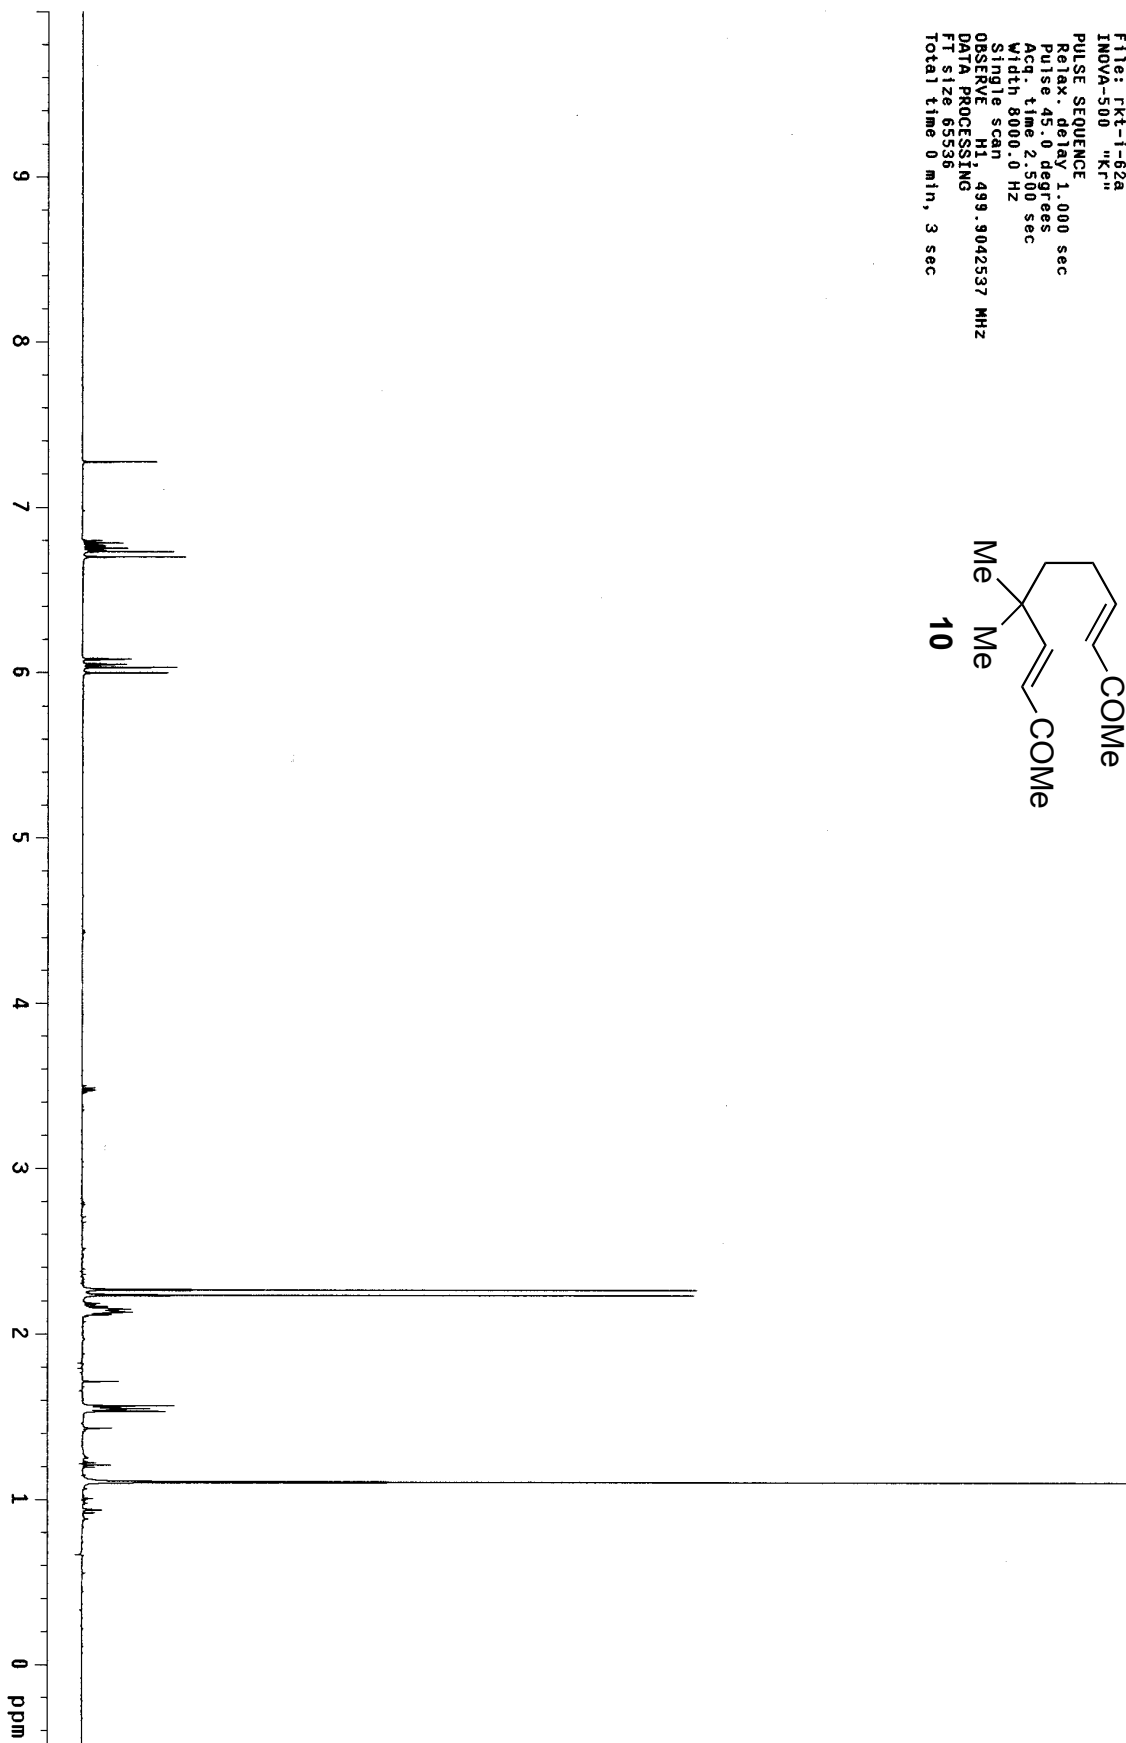

FKt-1-171a  
Pulse Sequence: szpu1  
Solvent: CDCl3  
Ambient temperature  
File: FKt-1-171a  
INOVA-500 "Kr"  
PULSE SEQUENCE  
Relax . delay 1.000 sec  
Pulse 45.0 degrees  
Acq. time 2.500 sec  
Width 8000.0 Hz  
8 repetitions  
OBSERVE HI 499.9042537 MHz  
DATA PROCESSING  
FT size 65536  
Total time 0 min, 28 sec

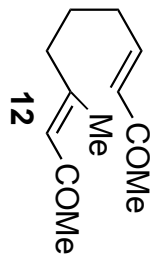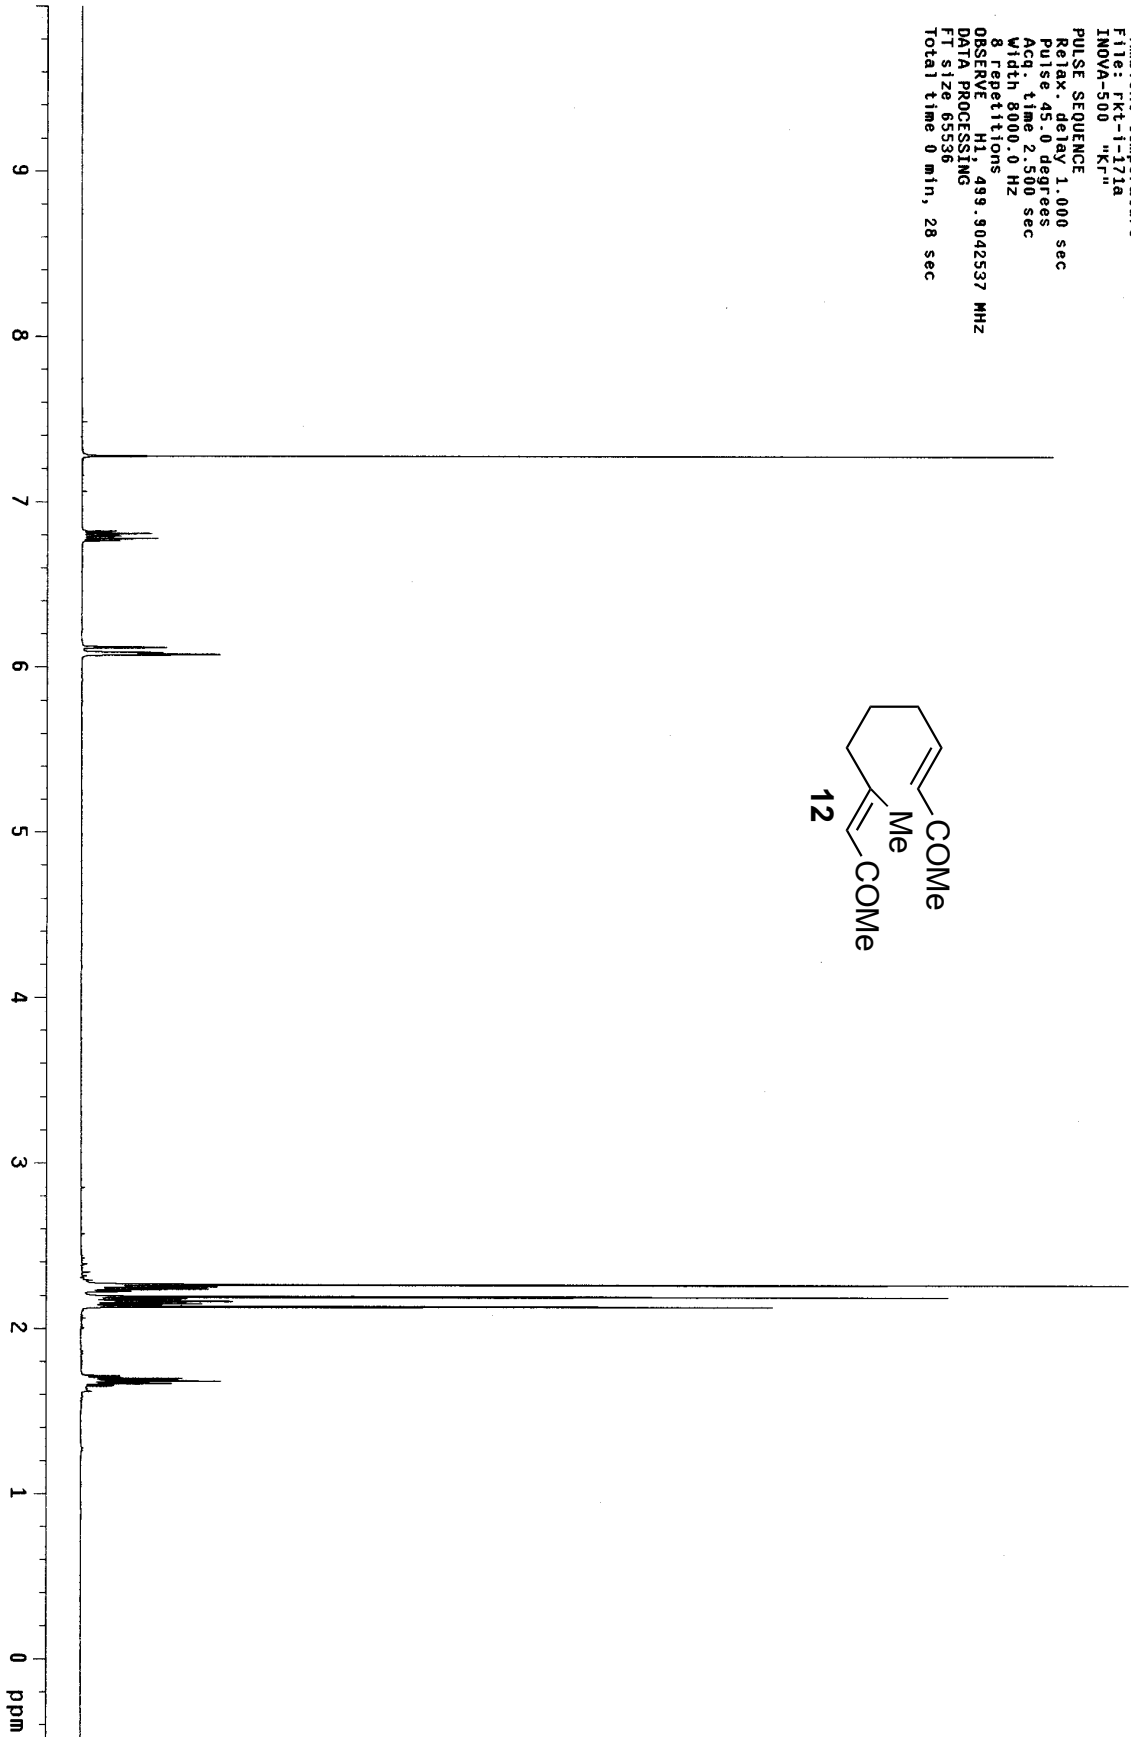

Rkt-I-150a  
Pulse Sequence: s2pul1  
Solvent: CDCl3  
Ambient temperature  
File: Rkt-I-150a  
INOVA-500 "Kf"  
PULSE SEQUENCE  
Relax. delay: 1.000 sec  
Pulse: 45.0 degrees  
Acq. time: 2.500 sec  
Width: 8000.0 Hz  
8 repetitions  
OBSERVE: H1, 499.9042537 MHz  
DATA PROCESSING  
F1 size: 65536  
Total time: 0 min, 28 sec

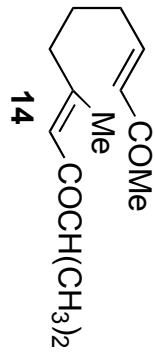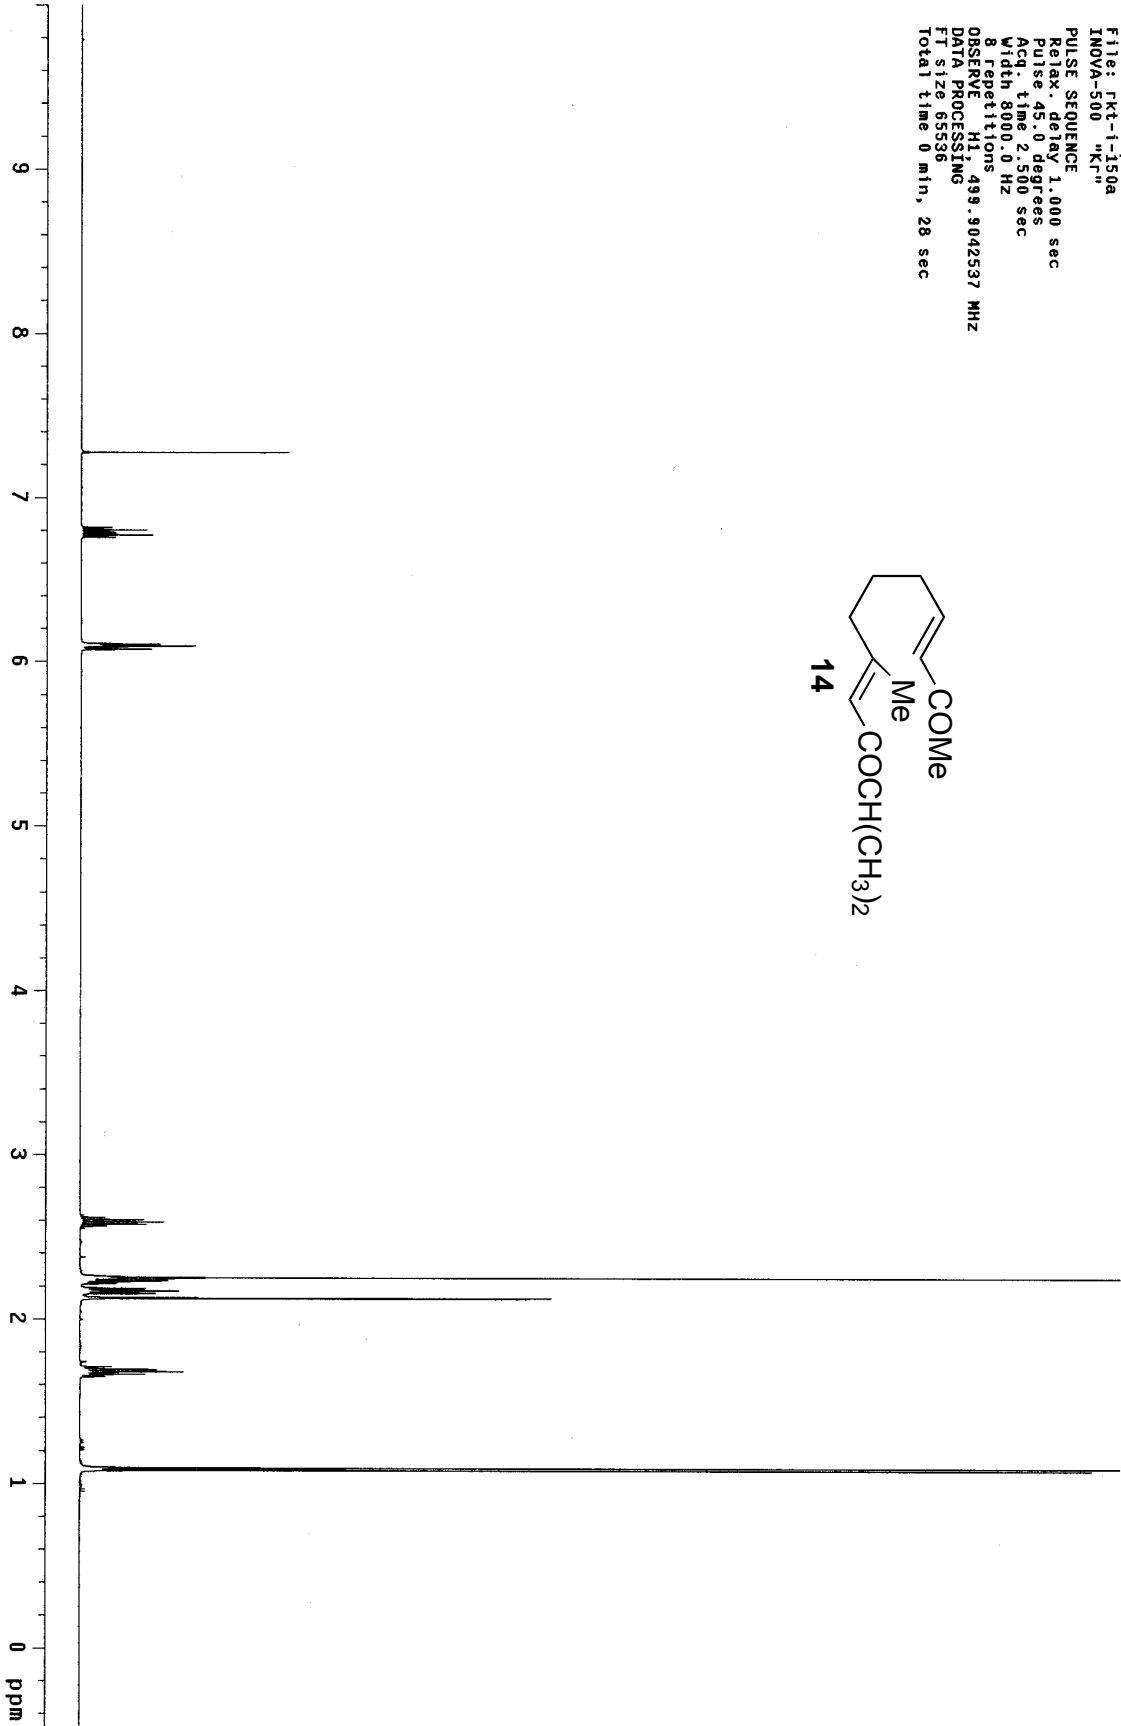

rkt-i-159a  
Pulse Sequence: szpul  
Solvent: CDCl3  
Ambient temperature  
File: rkt-i-159a  
INOVA-500 Krf  
PULSE SEQUENCE  
Relax. delay 1.000 sec  
Pulse 45.0 degrees  
Acq. time 2.500 sec  
Width 8000.0 Hz  
8 Repetitions  
OBSERVE H1, 499.9042537 MHz  
DATA PROCESSING  
F1 size 65536  
Total time 0 min, 28 sec

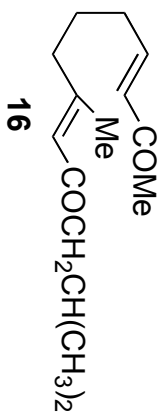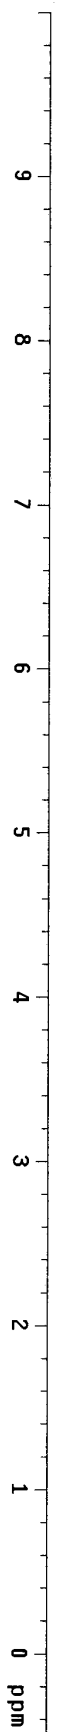

Rkt-i-170a  
Pulse Sequence: s2pu1  
Solvent: CDCl3  
Ambient temperature  
File: Rkt-i-170a  
INOVA-500 "K-"  
PULSE SEQUENCE  
Relax. delay 1.000 sec  
Pulse 45.0 degrees  
Acq. time 2.500 sec  
Width 8000.0 Hz  
8 repetitions  
OBSERVE H1 499.9042537 MHz  
DATA PROCESSING  
FT size 65536  
Total time 0 min, 28 sec

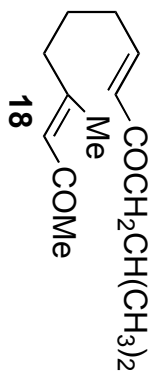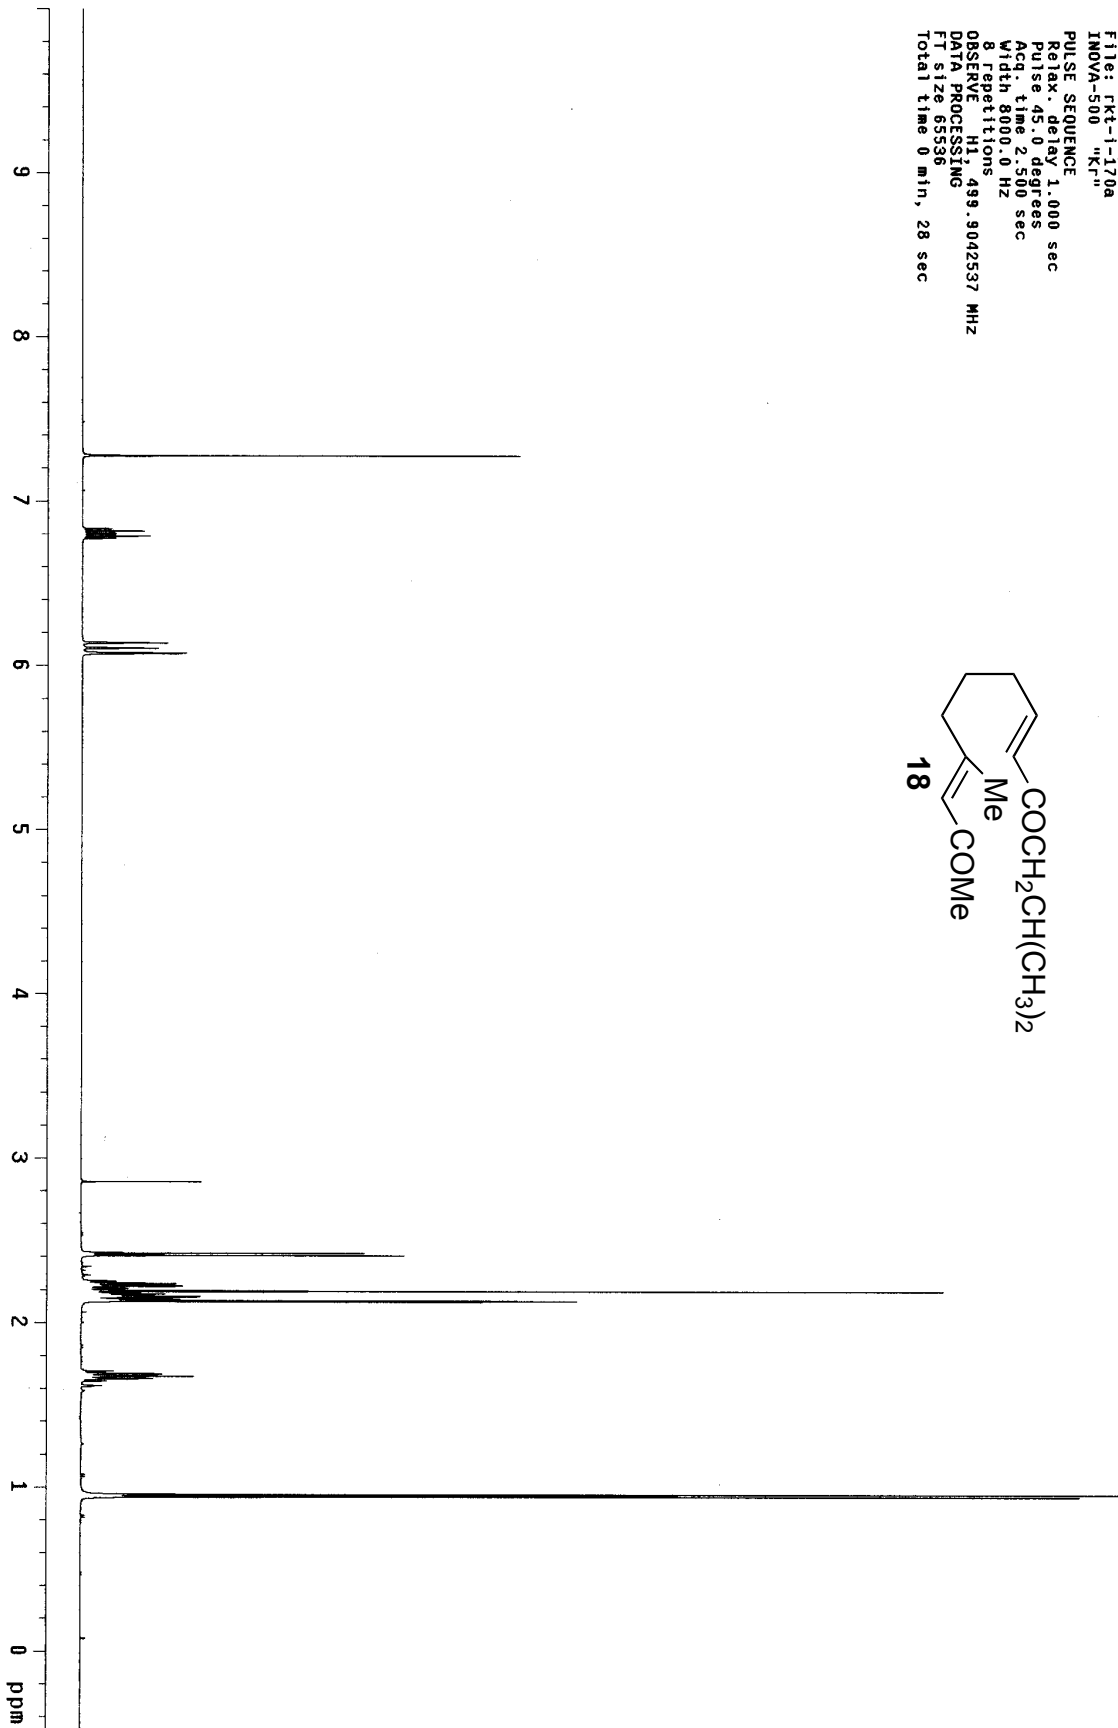



FKt-1-182b

Pulse Sequence: s2pu1

Solvent: CDCl3  
Ambient temperature

File: FKt-1-182b

INOVA-500

"Kf"

PULSE SEQUENCE

Relax: delay 1.000 sec

Pulse: 45.0 degrees

Acq. time 2.500 sec

Width 8000.0 Hz

8 repetitions

OBSERVE HI: 499.9042537 MHz

DATA PROCESSING

FT size 85536

Total time 0 min, 28 sec

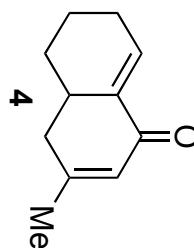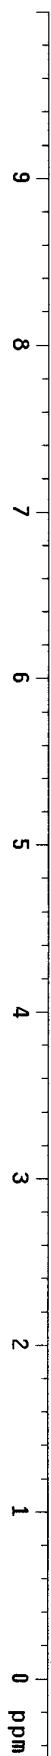

PKt-i-232c  
Pulse Sequence: s2pu1  
Solvent: CDCl3  
Ambient temperature  
File: PKt-i-231c  
INOVA-500 "Kf"  
PULSE SEQUENCE  
Relax. delay 1.000 sec  
Pulse 45.0 degrees  
Acq. time 2.500 sec  
Width 8000.0 Hz  
8 repetitions  
OBSERVE H1, 499.9042537 MHz  
DATA PROCESSING  
FT size 65536  
Total time 0 min, 28 sec

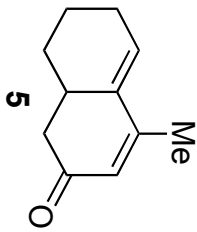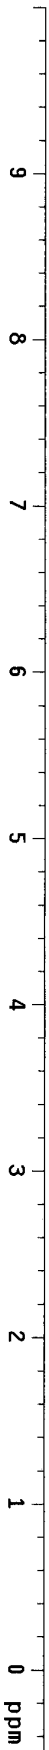

rkt-1-91b

Pulse Sequence: s2pu1  
Solvent: CDCl3  
Ambient temperature  
File: rkt-1-91b  
INOVA-500 "K-"  
PULSE SEQUENCE  
Pulse: 45.0 degrees  
Acq. time: 2.666 sec  
Width: 6000.6 Hz  
8 repetitions  
OBSERVE: H1, 399.9649645 MHz  
DATA PROCESSING  
Line broadening: 0.2 Hz  
FT size: 32768  
Total time: 0 min, 21 sec

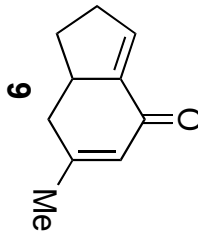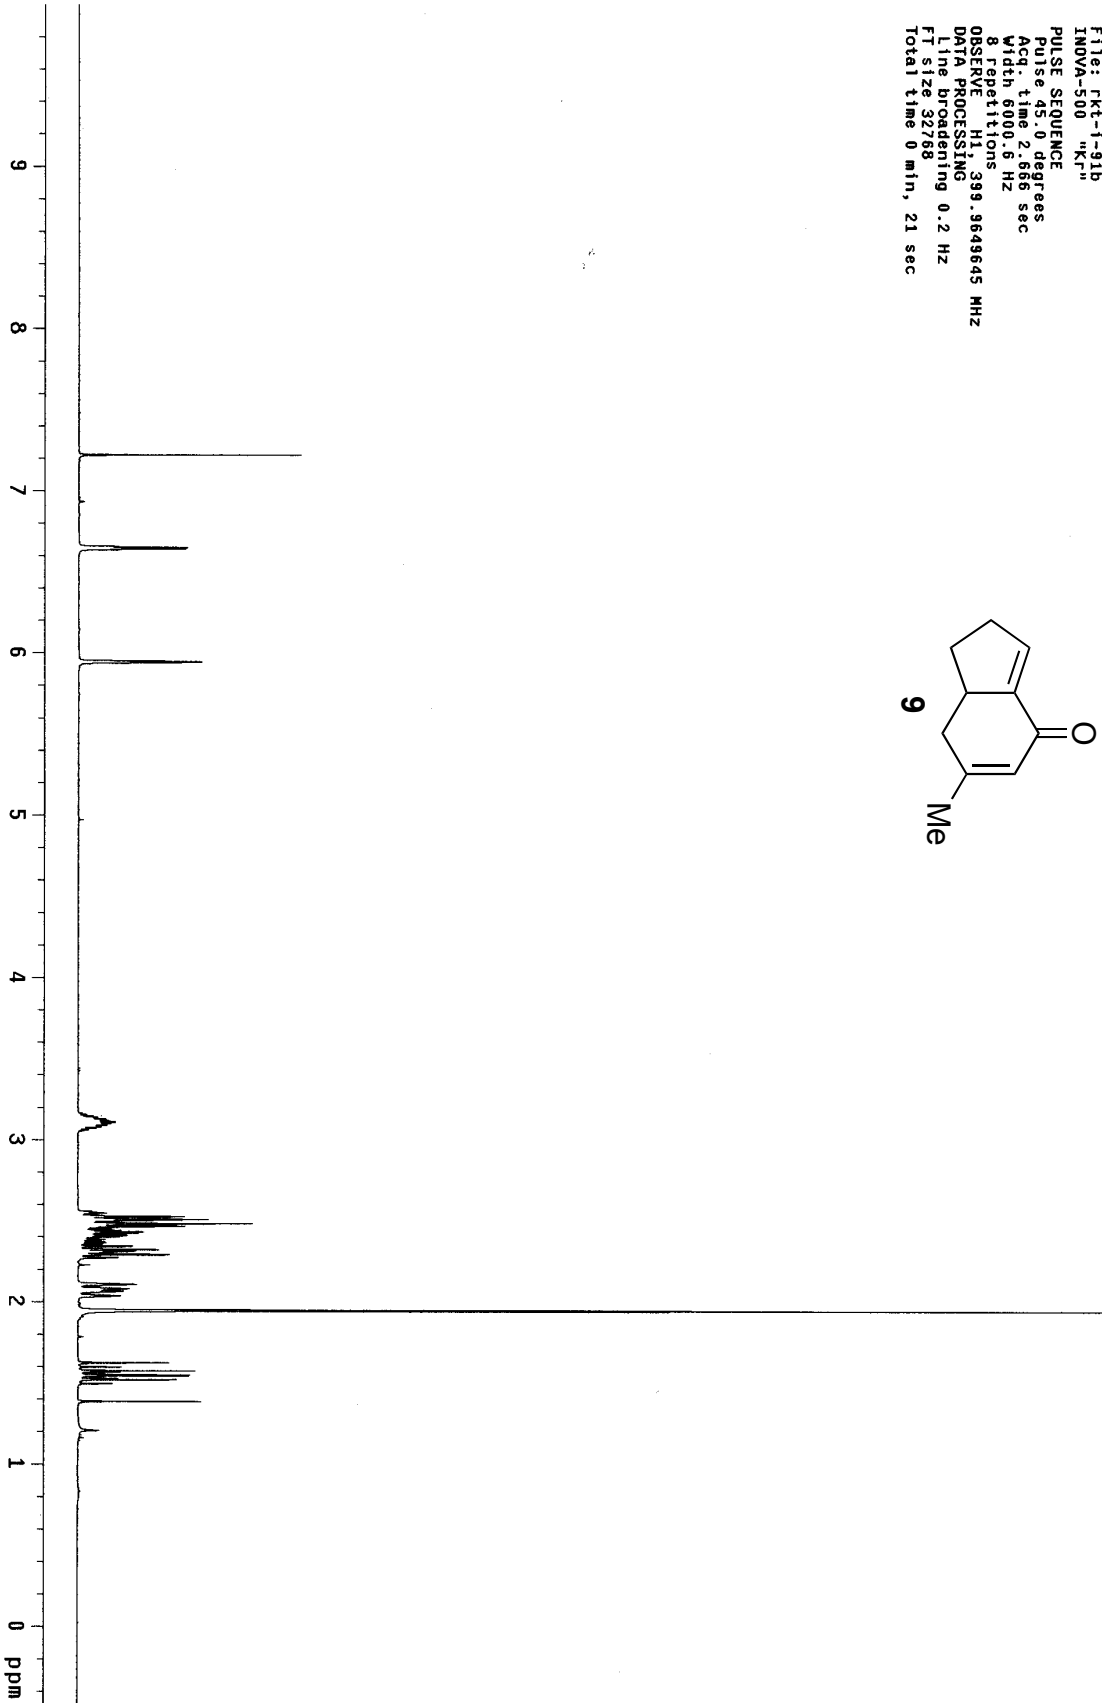

rkt-1-95c  
Pulse Sequence: s2pu1  
Solvent: CDCl3  
Ambient temperature  
File: rkt-1-95c  
INOVA-500 "K"  
PULSE SEQUENCE  
Relax. delay: 1.000 sec  
Pulse: 45.0 degrees  
Acq. time: 2.500 sec  
Width: 8000.0 Hz  
8 repetitions  
OBSERVE: H1, 499.9042608 MHz  
DATA PROCESSING  
FT size: 65536  
Total time: 0 min, 28 sec

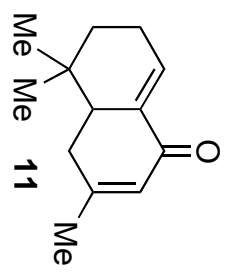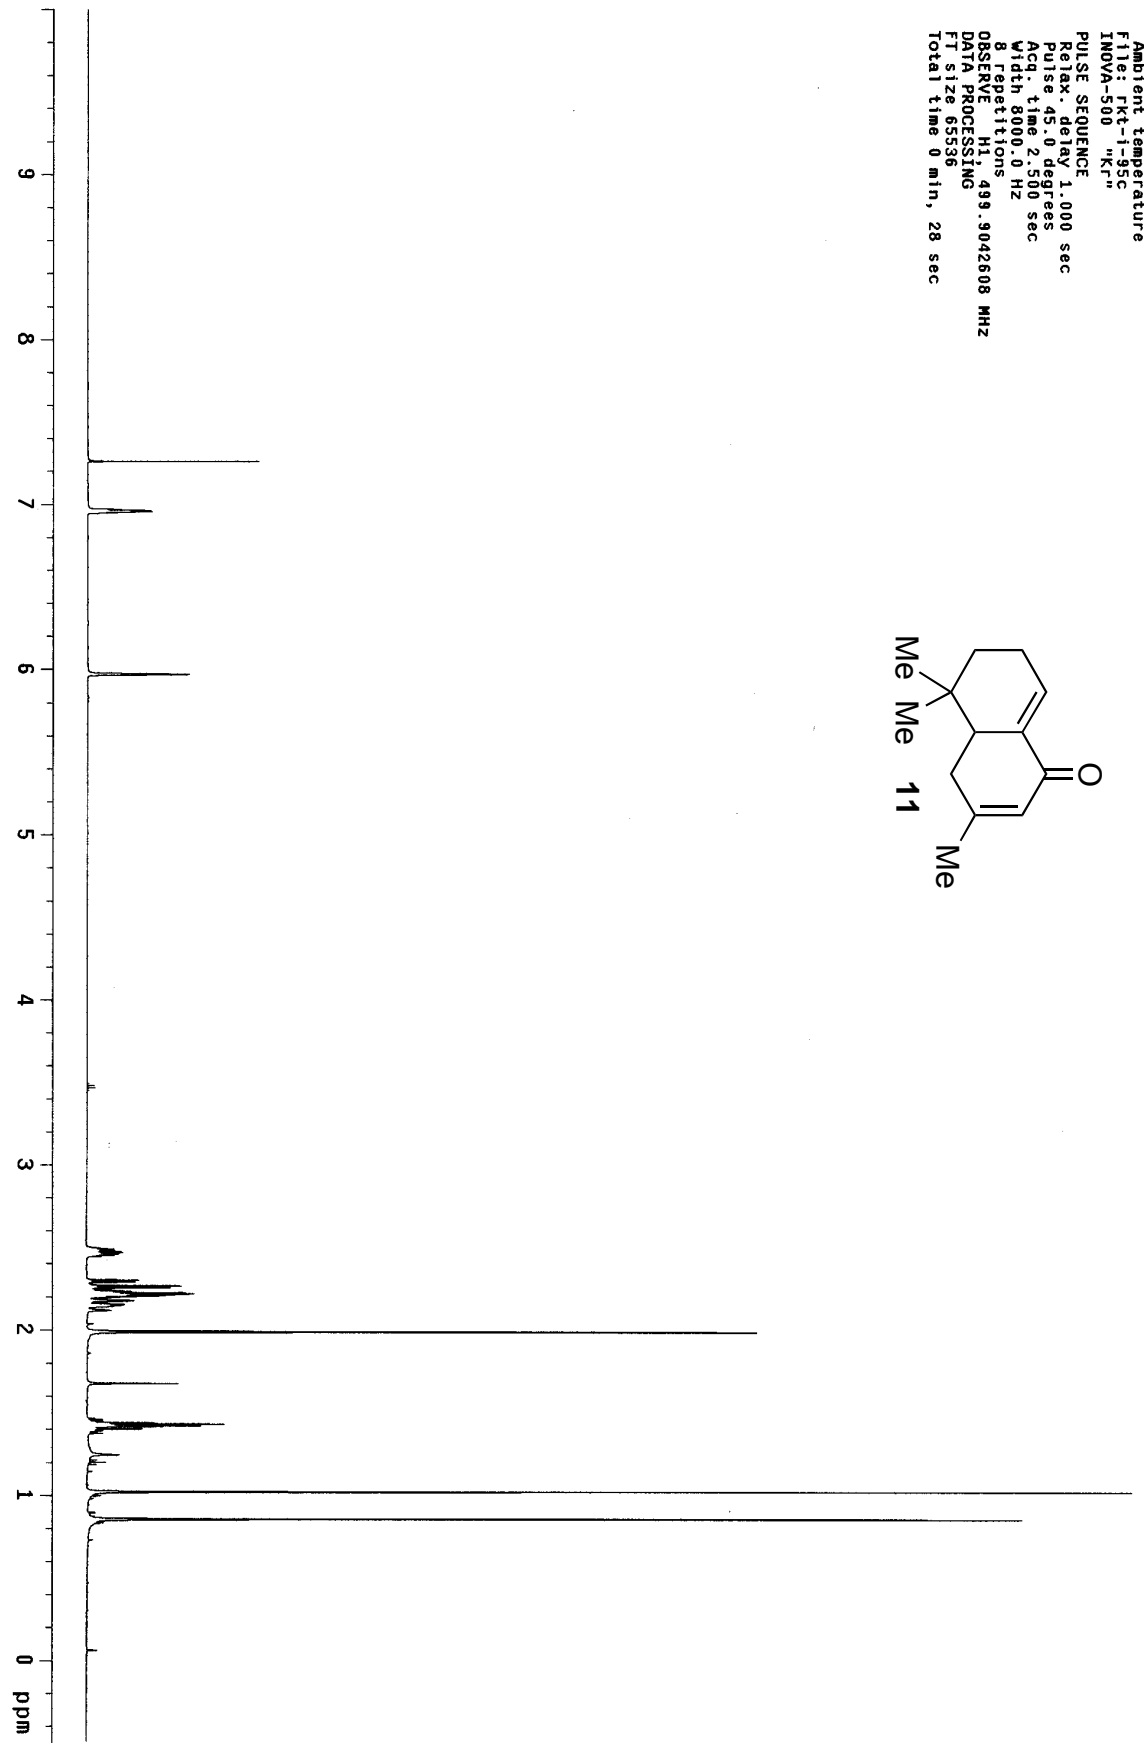

rkt-1-212c

Pulse Sequence: szpu1

Solvent: CDCl3  
Ambient temperature  
File: rkt-1-212c  
INOVA-500 "K"

PULSE SEQUENCE

Pulse 45.0 degrees  
Acq. time 2.566 sec  
Widh 6000.0 Hz  
R Freq 149.6 MHz

OBSERVED F1 F2 399.9649645 MHz  
DATA PROCESSING  
Line broadening 0.2 Hz  
F1 size 32768  
Total time 0 min, 21 sec

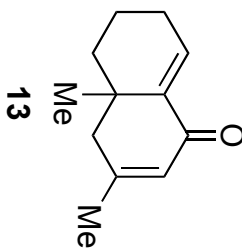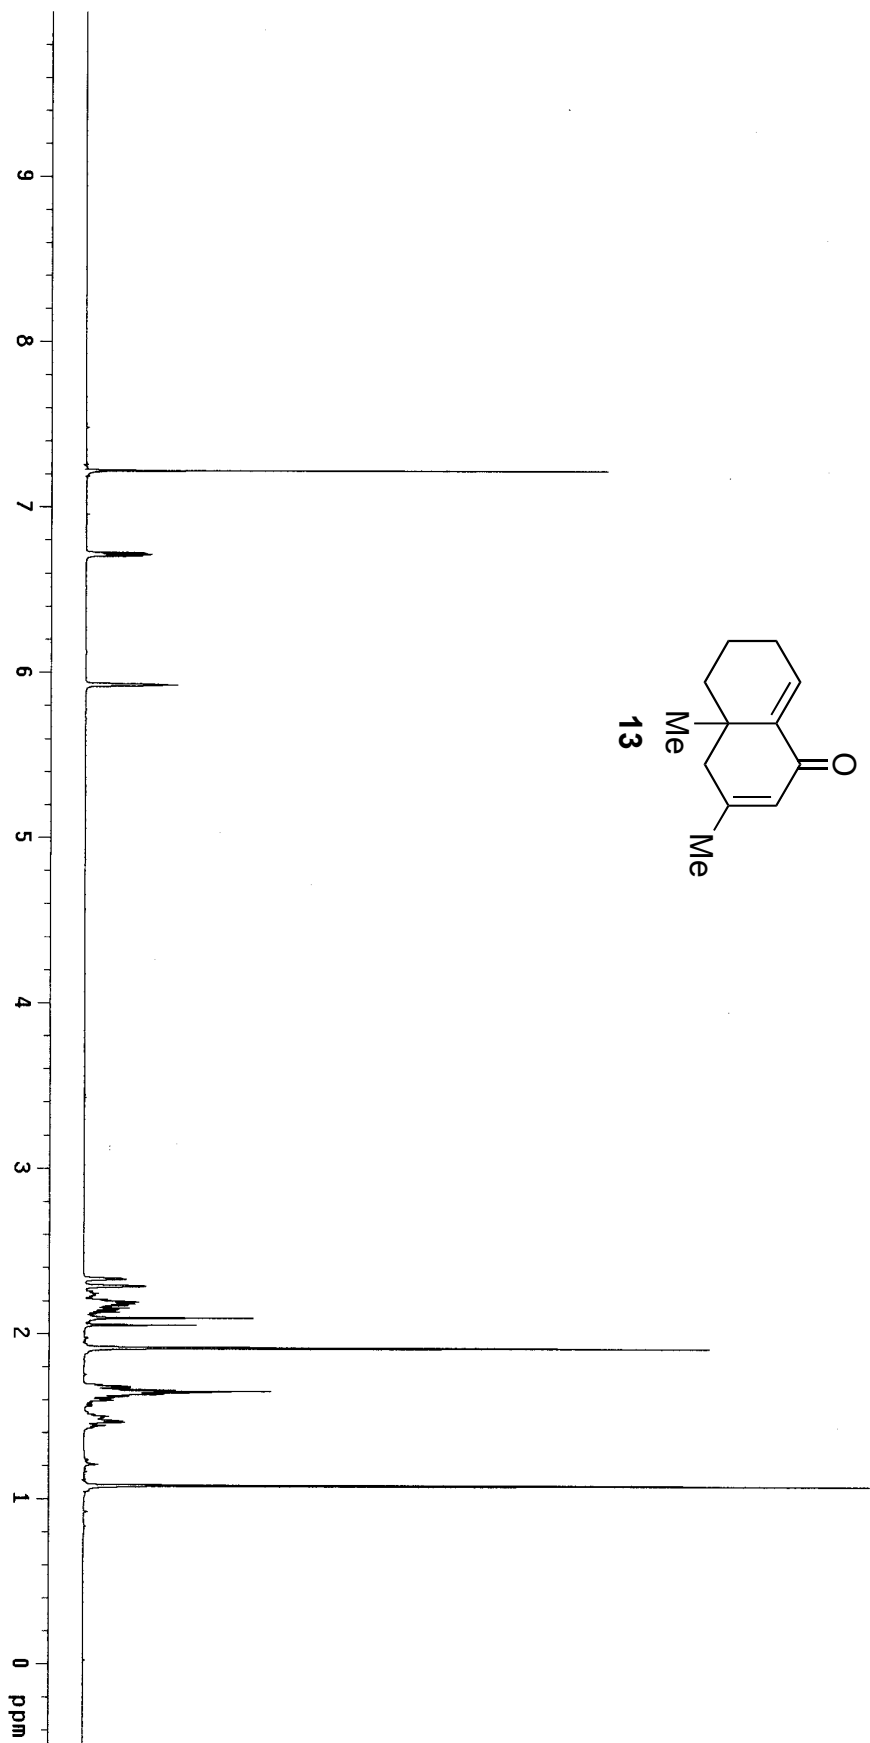

Rkt-i-230b  
Pulse Sequence: s2pu1  
Solvent: CDCl3  
Ambient temperature  
File: Rkt-i-230b  
INOVA-500 "K"  
PULSE SEQUENCE  
Relax: delay 1.000 sec  
Pulse: 43.0 degrees  
Acq. time: 2.500 sec  
Width: 8000.0 Hz  
8 repetitions  
OBSERVE H1: 499.9042537 MHz  
DATA PROCESSING  
FT size: 65536  
Total time: 0 min, 28 sec

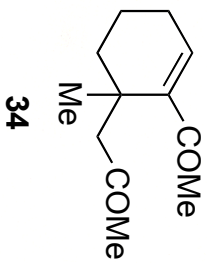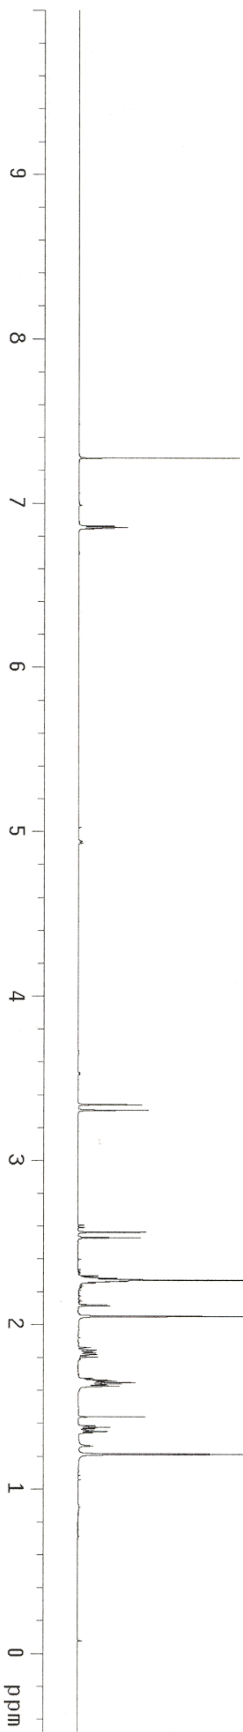

Rkt-1-213d  
Pulse Sequence: s2pu1  
Solvent: CDCl3  
Ambient temperature  
File: Rkt-1-213d  
INOVA-500 "R-"  
PULSE SEQUENCE  
Relax. delay: 1.000 sec  
Pulse: 45.0 degrees  
Acq. time: 2.500 sec  
Width: 8000.0 Hz  
8 repetitions  
OBSERVE H1, 499.9042537 MHz  
DATA PROCESSING  
FT size 65536  
Total time 0 min, 28 sec

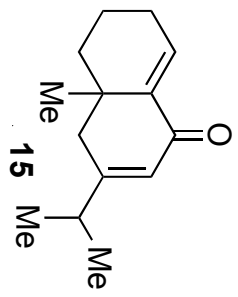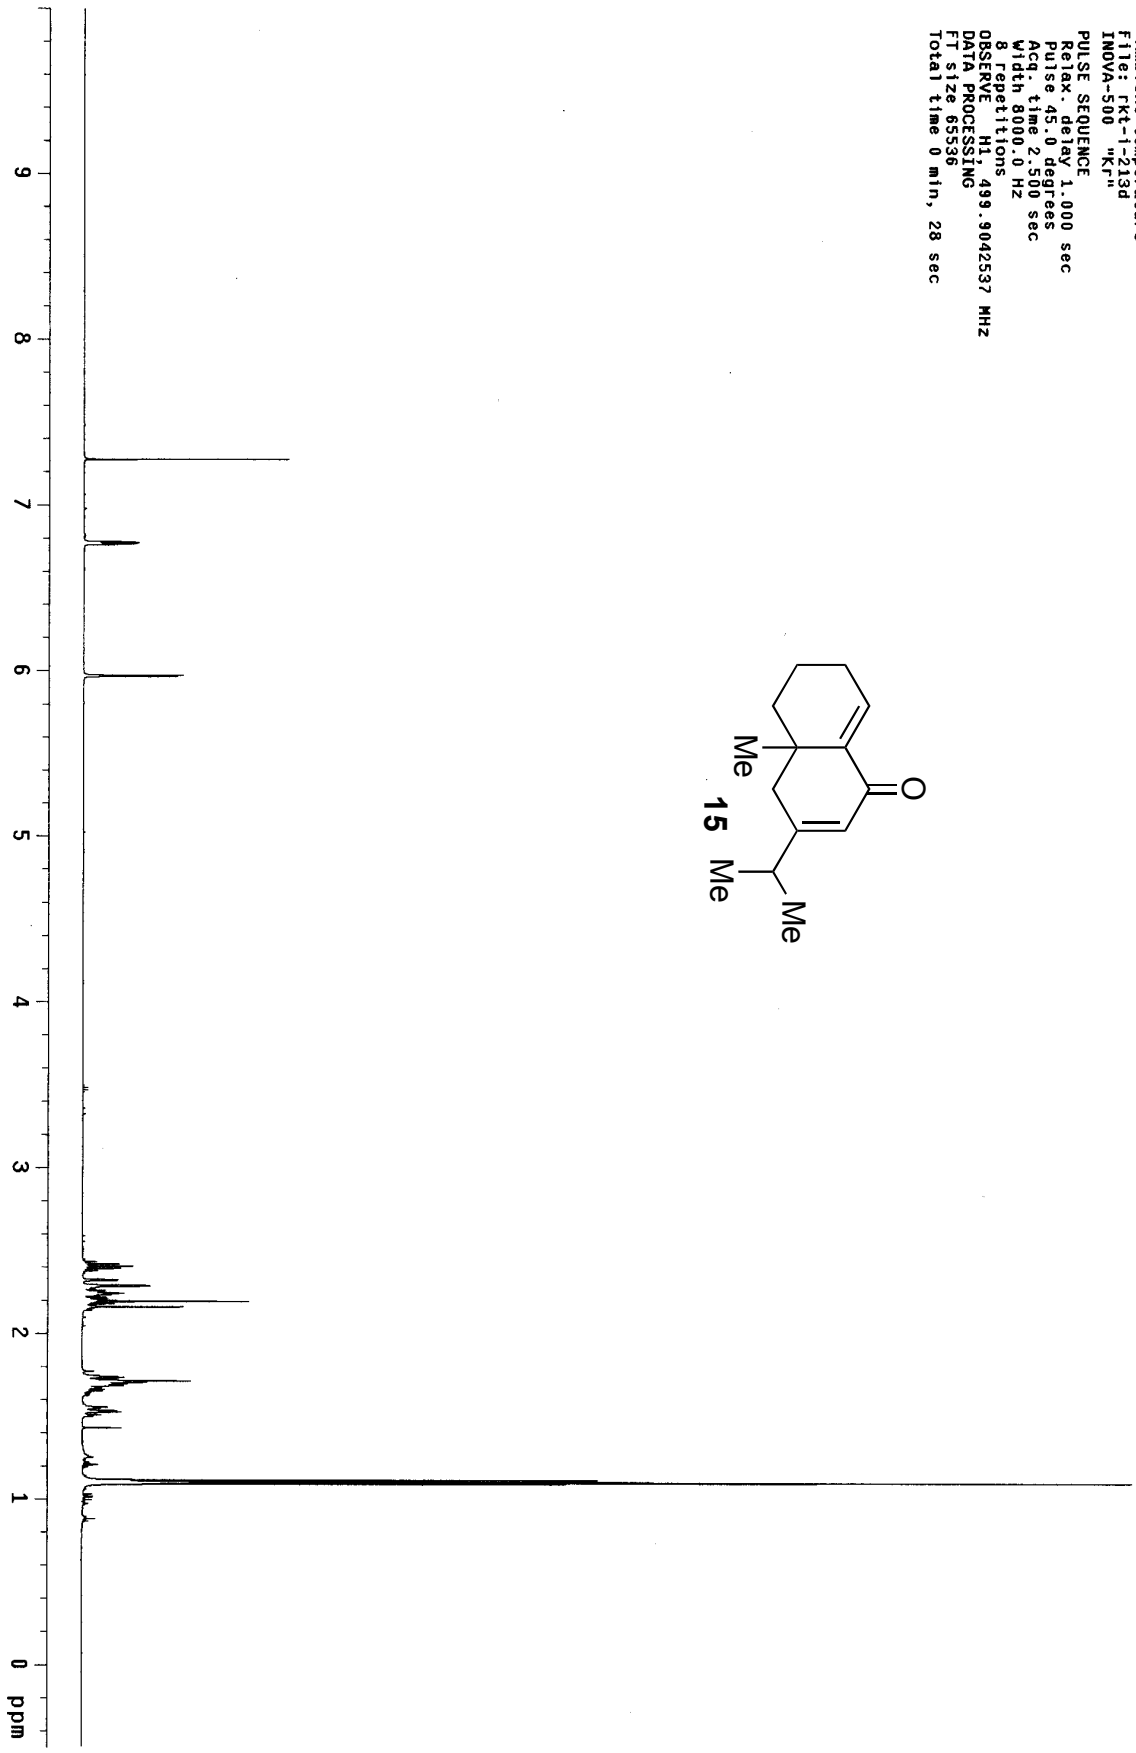

Rkt-i-227b  
Pulse Sequence: s2pu1  
Solvent: CDCl3  
Ambient temperature  
File: Rkt-i-227b  
INOVA-500 "K"  
PULSE SEQUENCE  
Relax: delay 1.000 sec  
Pulse: 45.0 degrees  
Acq: time 2.500 sec  
Width: 8000.0 Hz  
8 repetitions  
OBSERVE H1, 499.9042537 MHz  
DATA PROCESSING  
F1 size 65536  
Total time 0 min, 28 sec

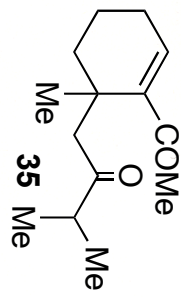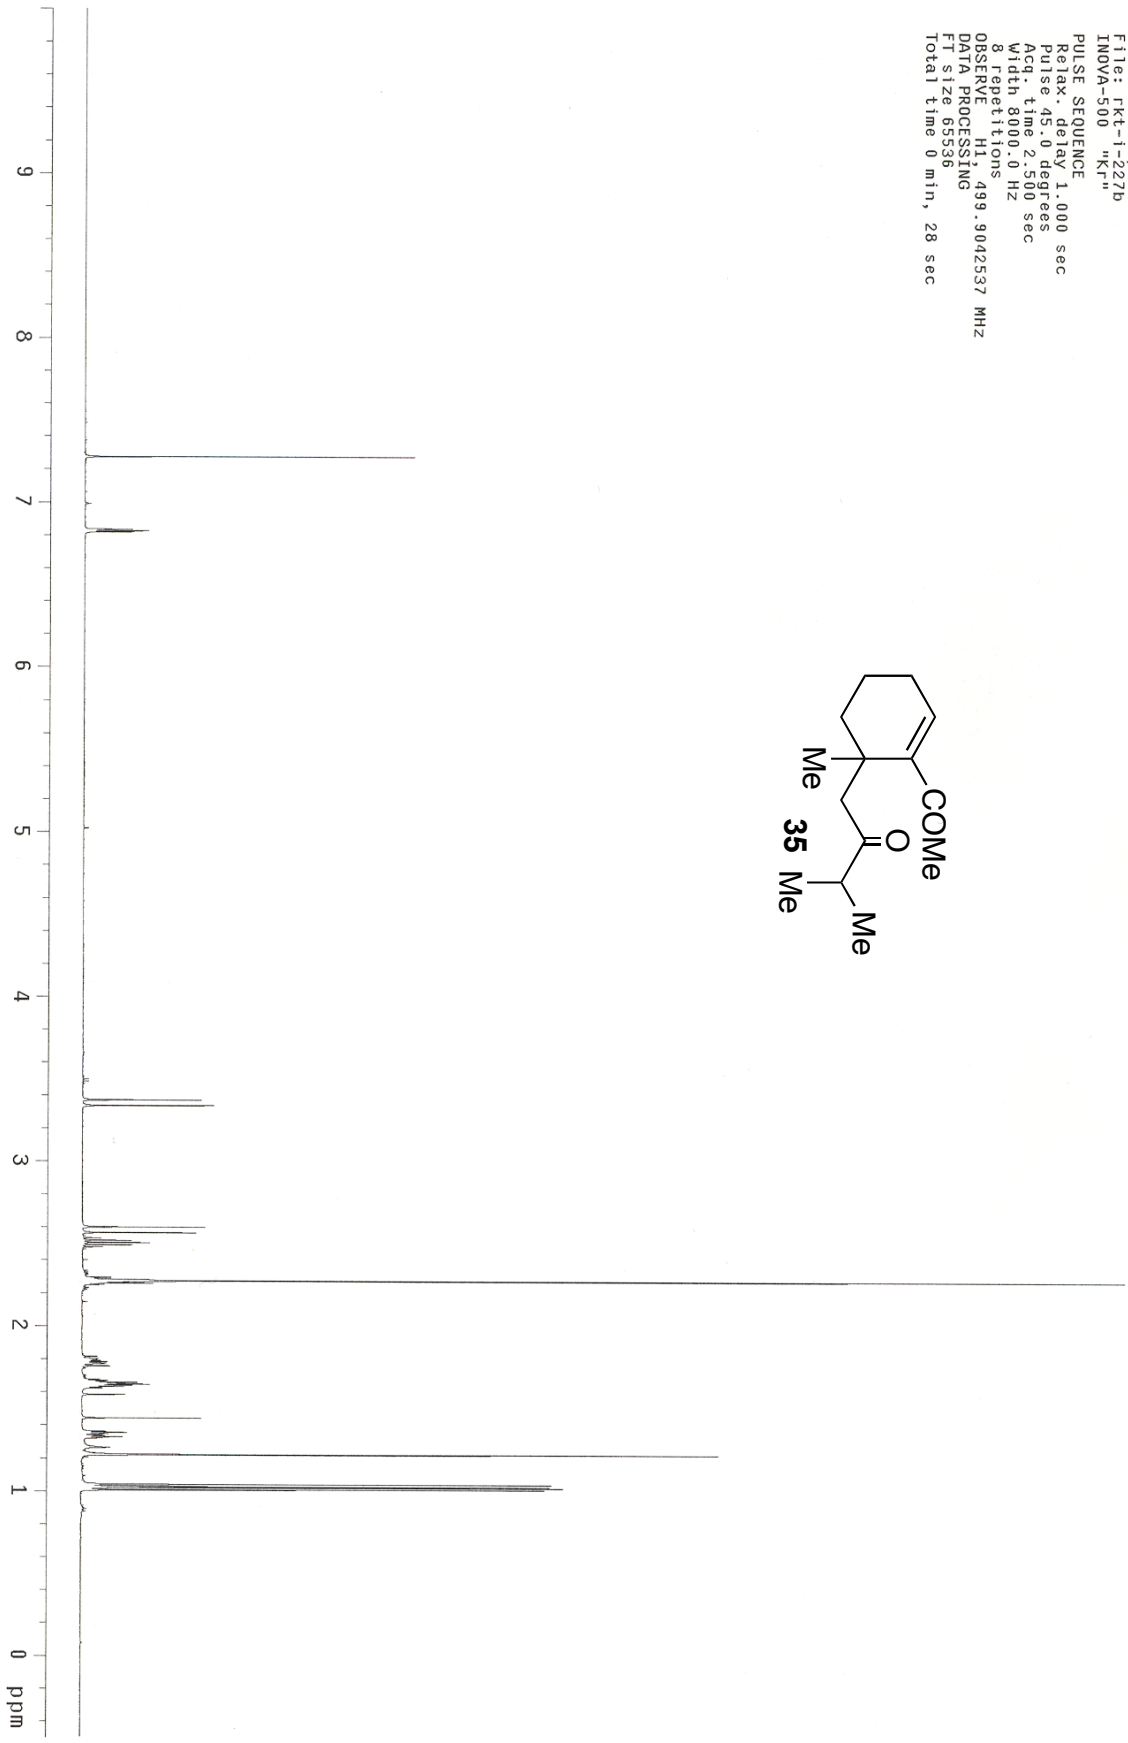



rkt-1-210c  
Pulse Sequence: s2pu1  
Solvent: CDCl3  
Ambient temperature  
File: rkt-1-210c  
INOVA-500 "K"r"  
PULSE SEQUENCE  
Relax delay: 1.000 sec  
Pulse: 45.0 degrees  
Acq time: 2.500 sec  
Width: 8000.0 Hz  
8 repetitions  
OBSERVE: H1, 499.9042537 MHz  
DATA PROCESSING  
F1 size: 65936  
Total time: 0 min, 28 sec

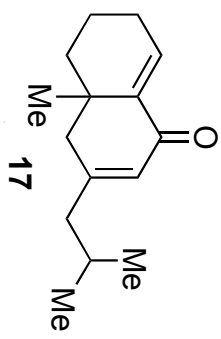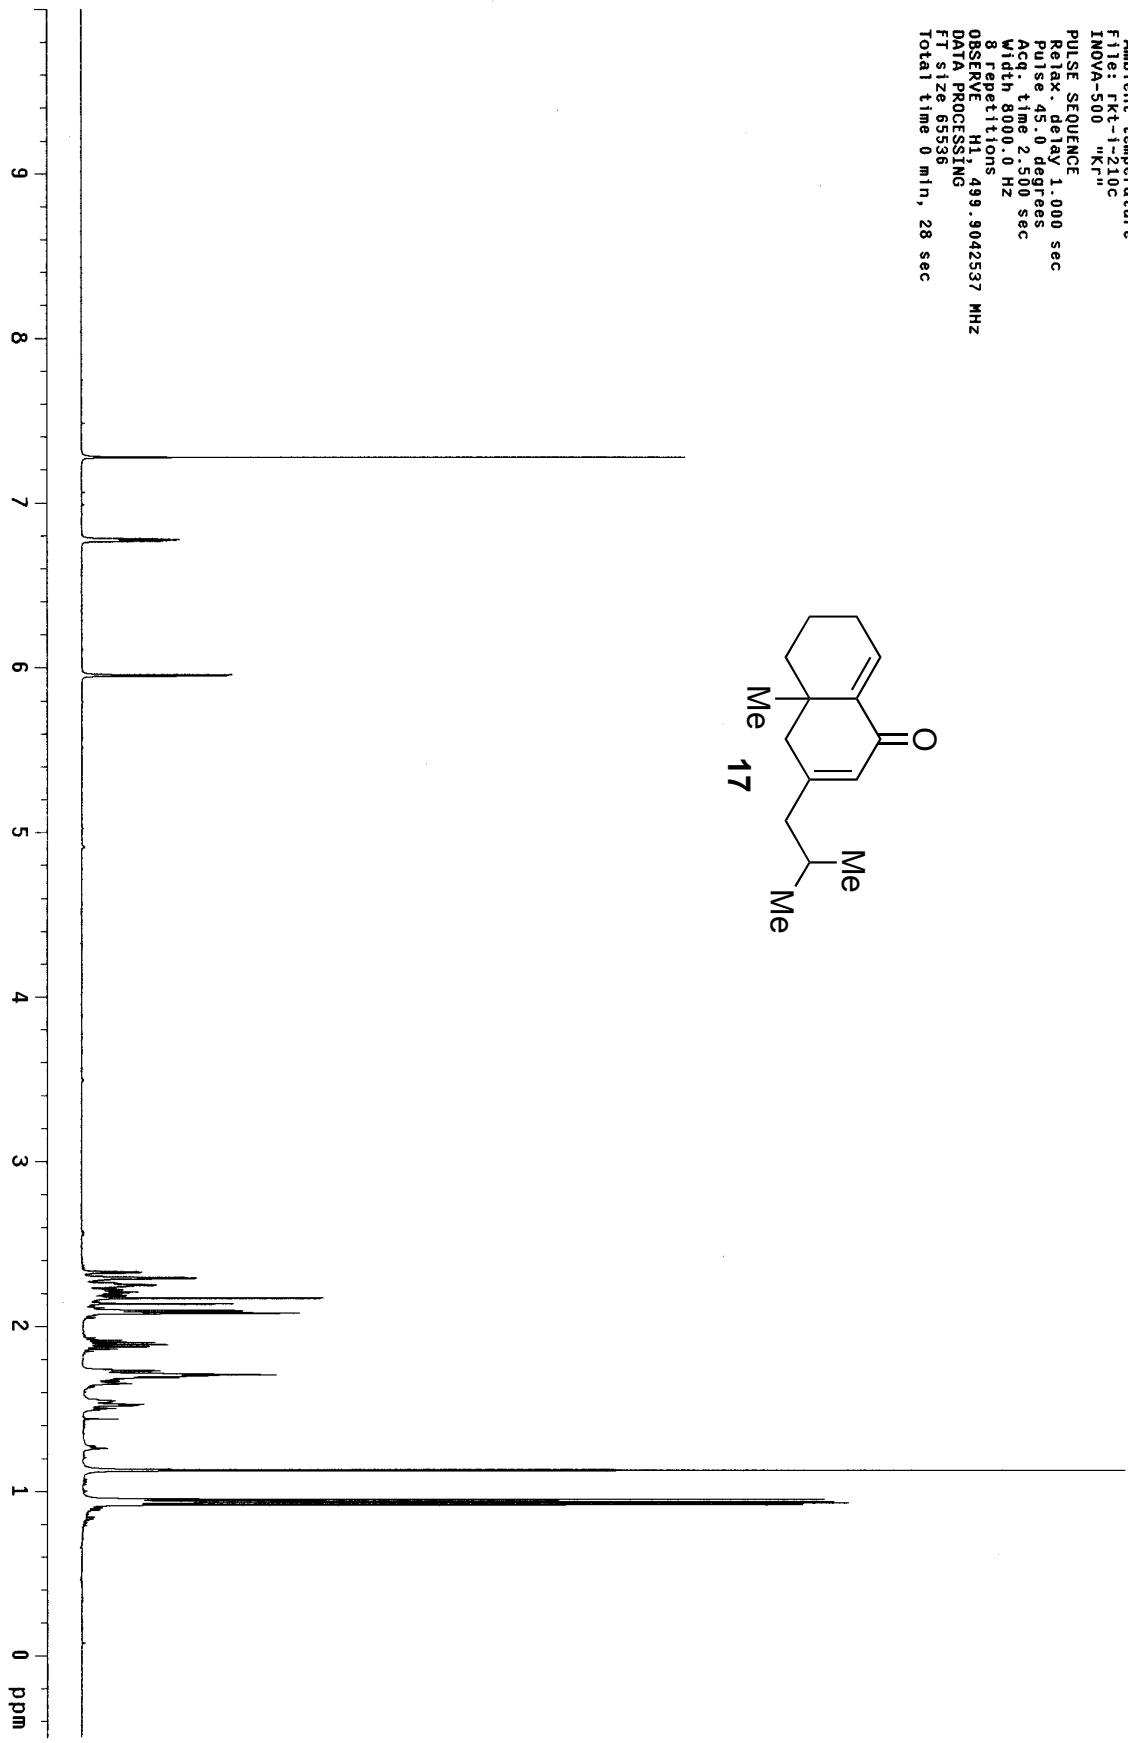

rkt-i-228b

Pulse Sequence: s2pu1

Solvent: CDCl3

Ambient temperature

File: rkt-i-228b

INOVA-500 "Kf"

PULSE SEQUENCE

Relax. delay 1.000 sec

Pulse 45.0 degrees

Acq. time 2.500 sec

Width 8000.0 Hz

8 repetitions

OBSERVE H1, 499.9042537 MHz

DATA PROCESSING

FI size 65536

Total time 0 min, 28 sec

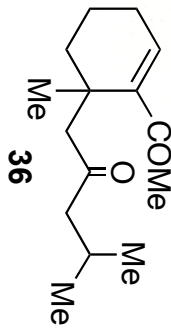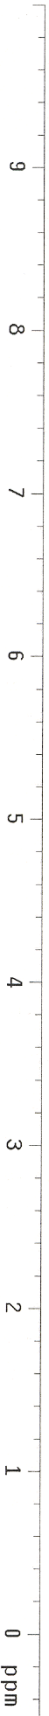

FKt-1-203b

Pulse Sequence: s2pu1

Solvent: CDCl3

Ambient temperature

File: FKt-1-203b

INDVA-500 "Kf"

PULSE SEQUENCE

Relax: delay 1.000 sec

Pulse: 43.0 degrees

Acq: time 2.500 sec

Width 8000.0 Hz

8 repetitions

OBSERVE H1: 499.9042537 MHz

DATA PROCESSING

FT size 65536

Total time 0 min, 28 sec

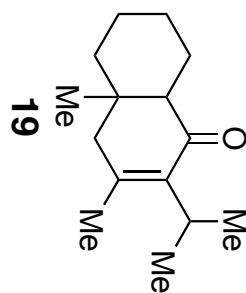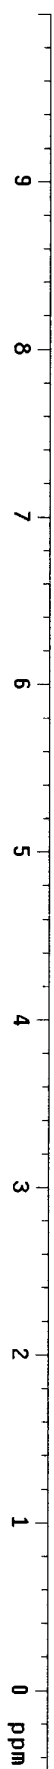

rkt-1-224c

Pulse Sequence: s2pu1

Solvent: CDCl3

Ambient temperature

File: rkt-1-224c

INDVA-500 "K"

PULSE SEQUENCE

Pulse 45 0 degrees

Acq. time 2.666 sec

Width 6000.6 Hz

8 Repetitions

OBSERVED F1 399.9649645 MHz

DATA PROCESSING

Line broadening 0.2 Hz

FT size 32768

Total time 0 min, 21 sec

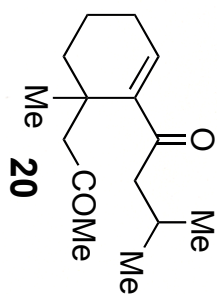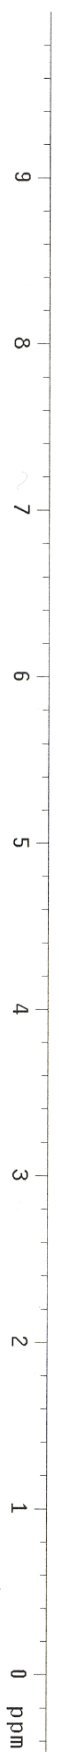

FKt-1-229b

Pulse Sequence: s2pu1

Solvent: CDCl3

Ambient temperature

File: FKt-1-229b

INOVA-500 "K"

PULSE SEQUENCE

Relax. delay 1.000 sec

Pulse 45.0 degrees

Acq. time 2.500 sec

Width 8000.0 Hz

8 repetitions

OBSERVE HI, 499.9042537 MHZ

DATA PROCESSING

FT size 65536

Total time 0 min, 28 sec

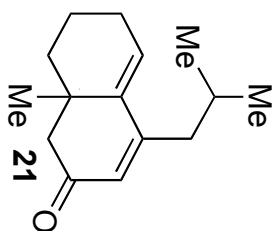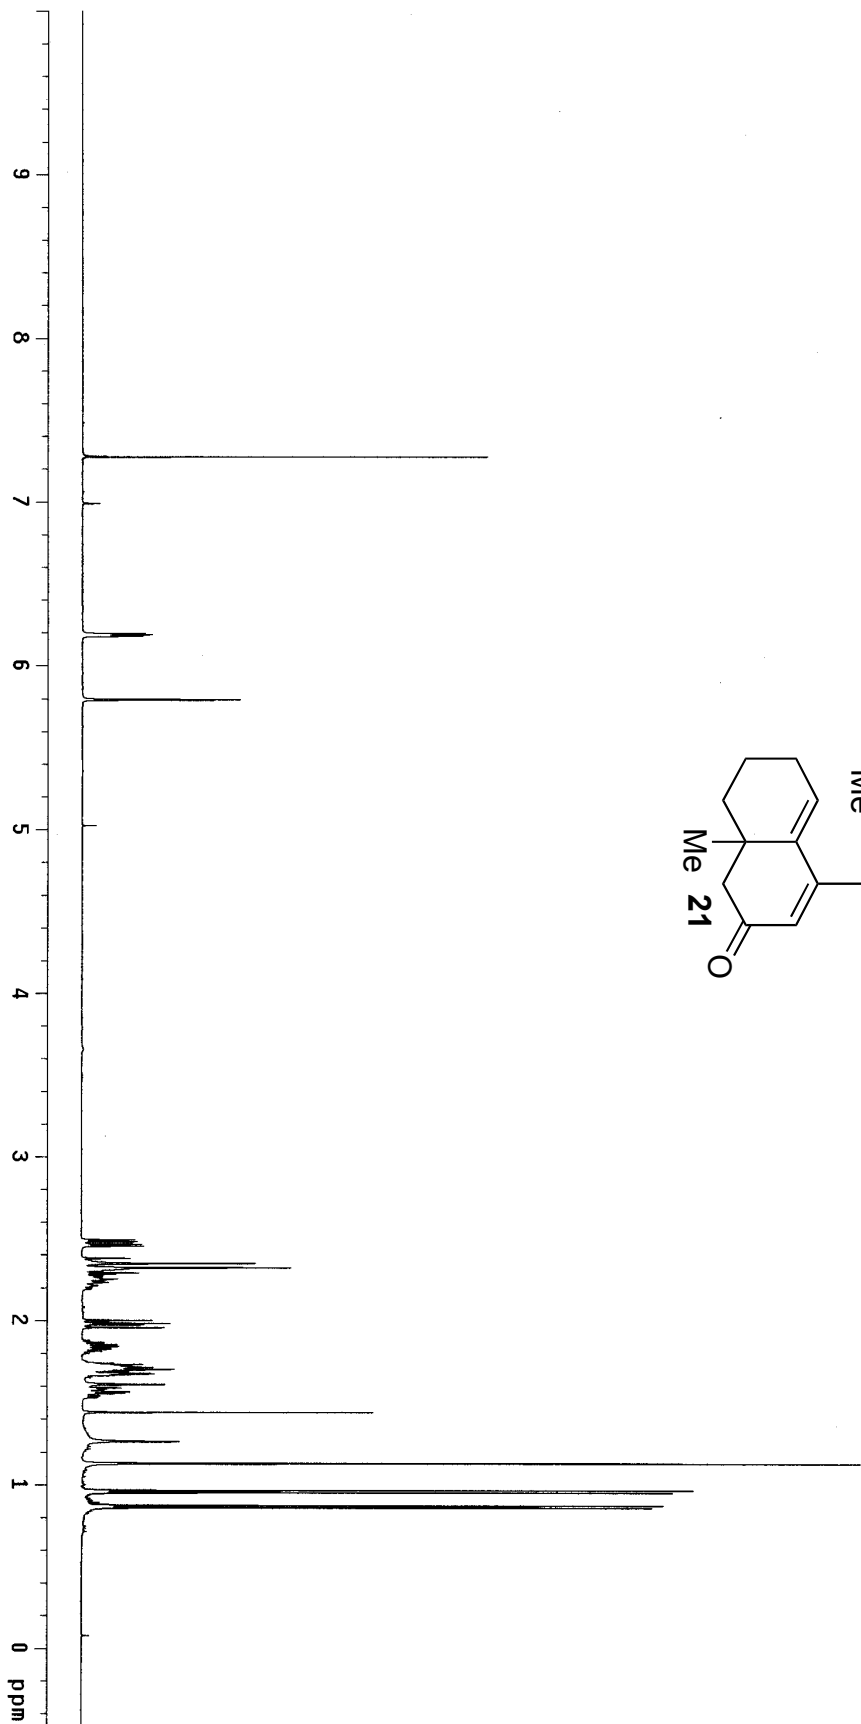

Supplement: NIHMS60234-supplement-SI2.pdf [file NIHMS60234-supplement-SI2.pdf]
